# Supplementary material
Source: PubMed Central journal article supplement (PMC5388553)
Supplement: supp_fj.201601116R_Supplemental_Data.pdf [file supp_fj.201601116R_Supplemental_Data.pdf]

**Critical role of the cyclic AMP-protein kinase A pathway in hyperglycemia-induced  
epigenetic activation of fibrogenic program in the kidney**

Dilip K. Deb, Riyue Bao and Yan Chun Li

Table S1. Oligonucleotide sequences used in the study

| <b>RT-PCR primers</b> | <b>Forward 5'-3'</b>                        | <b>Reverse 5'-3'</b>                         |
|-----------------------|---------------------------------------------|----------------------------------------------|
| mb2M                  | ACCGGCCTGTATGCTATCCAGAAA                    | ATTTCAATGTGAGGCGGGTGGAAAC                    |
| mGlut-1               | CTACAGTGTATCCTGTTGCCCTTC                    | CTTCTTTCATCTCCTGCAGGTCTC                     |
| mFN                   | CGAGGTGACAGAGACCACAA                        | CTG GAG TCA AGC CAG ACA CA                   |
| mCol IV               | AGGGTTACCTGGAGAAAAAGGG                      | TGGTCTCCTTTCTGTCCCTTC                        |
| mTgfb1                | GGAGCAACATGTGGAACCTCT                       | CCTGTATTCCGTCTCCTTGG                         |
| mTgfb3                | GATGAGCACATAGCCAAGCA                        | ATTGGGCTGAAAGGTGTGAC                         |
| mCtgf                 | GTGTGCACTGCCAAAGATGGTG                      | CAGCTTGACCCTTCTCGGGAA                        |
| mHk2                  | GAAGAGCTTTTCGACCACATTGT                     | CCTTGAATCCCTTTGTCCACTT                       |
| mPfk                  | AGATGGGTGCTAAGGCTATGAAC                     | AGTCTGTCTGGTCCTTCAGC                         |
| <b>ChIP primers</b>   | <b>Forward 5'-3'</b>                        | <b>Reverse 5'-3'</b>                         |
| Tgfb1 promoter        | ATCCACTGAGCACATAATGGCAC                     | TCATGTCCCTCCAACCCACA                         |
| Tgfb1 TSS             | CCCACGCTAAGATGAAGACAGTGCCCC                 | ACGGCCTGGGGCGCGAAG                           |
| Tgfb3 promoter        | CATGCACACACACACTGCTTTCTCTAT                 | TTACCACGTGGAACCAGAGGACTCA                    |
| Tgfb3 TSS             | GCGTTACTCCGTCTCCGCAAA                       | CGATACGTCATGGGAGGGAGGTATAAAATT               |
| Ctgf promoter         | GAGTGTCAAGGGGTCAGGATCA                      | GGAGTGGATCTGGCTGAGTCT                        |
| Ctgf TSS              | GGGGAGGAATGTGAGGAATGTC                      | TCTGGAGGAGGTCCGGTCT                          |
| <b>EMSA probes</b>    | <b>Forward 5'-3'</b>                        | <b>Reverse 5'-3'</b>                         |
| Canonical CRE         | GACGCGTGACGTCACAACAAGC                      | GCTTGTGTGACGTCACGCGTC                        |
| Canonical κB          | AGTTGAGGGGACTTTCCAGGC                       | GCCTGGGAAAGTCCCCTCAACT                       |
| mCtgf κB              | GGTGGGAGGAATGTGAGGAATGTCCCTG<br>TTTGTGTAGGA | TCCTACACAAACAGGGACATTCCTCACATTC<br>CTCCCCACC |
| mTgfb3CRE             | TATACCTCCCTCCCATGACGTATCGGCCTG<br>GGGTG     | CACCCCAGGCCGATACGTCATGGGAGGGAG<br>GTATA      |

Table S2. Gene names in representative Ingenuity pathways that are enriched in genes with HG-induced CBP and HAC peaks in the promoters.

| Canonical Pathways                      | Molecules                                                                                                                                                                                                                                                                                                                                                                                                                                                                                                                                                                                                                                                                                                                                                                                                                                |
|-----------------------------------------|------------------------------------------------------------------------------------------------------------------------------------------------------------------------------------------------------------------------------------------------------------------------------------------------------------------------------------------------------------------------------------------------------------------------------------------------------------------------------------------------------------------------------------------------------------------------------------------------------------------------------------------------------------------------------------------------------------------------------------------------------------------------------------------------------------------------------------------|
| EIF2 Signaling                          | SOS2,PIK3C2A,RPL23,RPS5,PIK3CB,RPL26,RPS13,RPS19,RPL8,EIF3E,RPS11,RPL14,RPL19,RPL27A,RPS29,RPS6,PIK3R3,RPL11,RPS18,EIF3A,RAF1,RPL35,RPL22,PABPC1,EIF4G2,EIF5,RPS12,RPL7,NRAS,RPLP0,RPS9,EIF2AK4,PIK3R2,PAIP1,PPP1R15A,PPP1CB,EIF3H,EIF3K,RPS27A,RPL15,EIF3F,GSK3B,RPS27L,EIF3M,RPS10,RPS26,EIF2B3,EIF4A2,PIK3R1,EIF3B,EIF3I,RPS20,EIF2AK1,RPL28,EIF2S2,RPL38,RPS15A,Rpl22I1,RPL37,RPL3,GRB2,EIF2B1,RPS4Y1,RPL31,EIF4A1,EIF4A3,RPL18A,RPL17,RRAS2,RPL21,ATM,RPL7L1,AKT2,SOS1,EIF3D,EIF2S3,PDPK1,RPS17,MAP2K2,MAPK1,RPS23,RPL36AL,EIF4G3,RPS28,Rpl36a,EIF2B4,EIF2AK3,RPL10                                                                                                                                                                                                                                                                 |
| Regulation of eIF4 and p70S6K Signaling | PPP2R5E,SOS2,PIK3C2A,RPS5,PIK3CB,RPS13,RPS19,EIF3E,PPP2R5A,RPS11,PPP2CB,PAIP2,RPS6KB1,RPS29,RPS6,PIK3R3,RPS18,EIF3A,RAF1,MAPK12,PABPC1,EIF4G2,RPS12,NRAS,RPS9,PIK3R2,PAIP1,EIF3H,PPP2R5D,EIF3K,RPS27A,EIF3F,RPS27L,EIF3M,MAPK14,RPS10,RPS26,ITGA3,EIF2B3,IRS1,EIF4A2,PIK3R1,EIF3B,EIF3I,RPS20,EIF2S2,RPS15A,ITGB1,GRB2,EIF2B1,RPS4Y1,EIF4A1,EIF4A3,EIF4EBP1,MTOR,RRAS2,ATM,PPM1L,AKT2,SOS1,EIF3D,EIF2S3,PDPK1,RPS17,MAP2K2,MAPK1,RPS23,EIF4G3,MKNK1,RPS28,EIF2B4                                                                                                                                                                                                                                                                                                                                                                         |
| PI3K/AKT Signaling                      | PPP2R5E,SOS2,PTEN,YWHAQ,PIK3CB,INPP5B,PPP2R5A,PPP2CB,SYNJ2,RPS6KB1,PIK3R3,YWHAG,JAK2,CTNNB1,RAF1,IKBK,FKB2,NRAS,PIK3R2,CDKN1B,CCND1,PPP2R5D,BCL2L1,LIMS1,YWHAZ,FOXO3,GSK3B,YWHAQ,MCL1,ITGA3,GSK3A,PIK3R1,GAB1,YWHAH,ITGB1,GRB2,HSP90AA1,TSC1,YWHAB,EIF4EBP1,SYNJ1,FOXO1,RPS6KB2,NFKB1,MTOR,CHUK,GDF15,RRAS2,PPM1L,TYK2,AKT2,SOS1,RELA,PDPK1,GAB2,BCL2,MAP2K2,MAPK1,RHEB,MDM2,HSP90AB1                                                                                                                                                                                                                                                                                                                                                                                                                                                    |
| mTOR Signaling                          | PPP2R5E,PIK3C2A,PRKAA1,PLD3,EIF4B,PRKAG2,RPS5,PIK3CB,RPS13,RPS19,EIF3E,PPP2R5A,RPS11,PPP2CB,MLST8,RHOT1,RND3,RPS6KB1,PRKCE,RPS29,RPS6,PIK3R3,PRKD3,RPS18,EIF3A,EIF4G2,RPS12,GNB1L,NRAS,RPS9,RPTOR,PIK3R2,RHOB,EIF3H,PPP2R5D,EIF3K,RPS27A,PRKAG1,EIF3F,PRKAB2,RPS27L,EIF3M,RPS10,RPS26,RHOD,RICTOR,IRS1,EIF4A2,RHOQ,PIK3R1,EIF3B,EIF3I,ATG13,RPS20,RPS15A,RPS4Y1,PRKCI,EIF4A1,EIF4A3,TSC1,EIF4EBP1,RPS6KB2,MTOR,RRAS2,ATM,PPM1L,AKT2,RHOG,EIF3D,PDPK1,NAPEPLD,RPS17,HIF1A,PLD2,MAPK1,RPS23,EIF4G3,RPS28,RH,EB,RAC1                                                                                                                                                                                                                                                                                                                        |
| Cell Cycle: G1/S Checkpoint Regulation  | E2F6,GSK3B,TGFB1,HDAC10,HDAC8,CDKN2A,CUL1,SMAD4,MAX,CCND3,GNL3,SKP2,SKP1,SIN3A,PA2G4,RBL1,CDK6,FOXO1,E2F5,CCNE2,HDAC5,TGFB3,CDK4,RPL11,CDKN2C,ATM,CDC25A,CDK2,HDAC3,HDAC7,ABL1,MYC,CDKN1B,CCND1,CDKN2B,MDM2,PAK1IP1,TFDP1                                                                                                                                                                                                                                                                                                                                                                                                                                                                                                                                                                                                                |
| Insulin Receptor Signaling              | GRB10,SOS2,PTEN,PIK3C2A,FOXO4,PRKAG2,PRKACB,PIK3CB,INPP5B,SYNJ2,SH2B2,RPS6KB1,PRKAR2A,PIK3R3,JAK2,CRKL,RAF1,PTPN1,PRKAR1A,NRAS,RPTOR,SGK1,PIK3R2,PPP1CB,PRKAG1,FOXO3,GSK3B,EIF2B3,IRS1,GSK3A,RHOQ,PIK3R1,GAB1,CBL,PPP1R14B,PTPN11,GRB2,EIF2B1,CRK,MAPK8,PRKCI,RAPGEF1,TSC1,EIF4EBP1,SYNJ1,FOXO1,RPS6KB2,MTOR,RRAS2,PPP1R12A,ATM,AKT2,SOS1,PPP1R14C,PDPK1,STXBPA,MAP2K2,MAPK1,PRKACA,EIF2B4,STX4                                                                                                                                                                                                                                                                                                                                                                                                                                          |
| ERK/MAPK Signaling                      | PPP2R5E,SOS2,PIK3C2A,MYCN,PRKAG2,PRKACB,RAP1A,PIK3CB,HSPB2,PPP2R5A,PPP2CB,DUSP4,PRKAR2A,PRKCE,MAPKAPK5,PIK3R3,SRC,TLN1,YWHAQ,CRKL,RAF1,ATF1,H3F3A/H3F3B,PTK2,DUSP2,PRKAR1A,HSPB1,MYC,NRAS,PIK3R2,LAMTOR3,RAP1B,PPP1CB,BCAR1,PPP2R5D,DUSP6,ETS1,PRKAG1,YWHAZ,YWHAQ,ATF2,CREB1,ITGA3,PIK3R1,YWHAH,RAPGEF3,ETS2,DUSP1,PPP1R14B,ITGB1,GRB2,CRK,PRKCI,RAPGEF1,YWHAB,EIF4EBP1,PAK2,RRAS2,PPP1R12A,ATM,PPM1L,EP300,PXN,NFATC1,SOS1,PPP1R14C,ATF4,MAP2K2,MAPK1,MKNK1,PRKACA,PAK4,RAC1                                                                                                                                                                                                                                                                                                                                                            |
| Mitochondrial Dysfunction               | NDUFA10,VDAC3,COX7B,DHODH,ATP5F1,COX5A,NDUFA1,NDUFAF1,NDUFA5,CYCS,FIS1,NDUFAF2,NDUFA8,GSR,TXN2,SDHD,ATP5A1,ATP5C1,ATPAF1,COX4I1,NDUF57,COX7A2L,HTRA2,MAPK12,NDUFA2,NDUF54,ATP5G1,UQCRC2,NDUFA4,PRDX5,PSENEN,COX6A1,AIFM1,NDUFB2,UQCRCB,ATP5G3,VDAC1,OGDH,CPT1A,GLRX2,NDUFV3,ATP5I,PRDX3,NDUFA13,COX7A2,COX10,COX6B1,UQCRC11,MAPK8,UQCRCF1,ATP5G2,NDUFV2,PSEN1,SDHA,ATP5D,PDHA1,NDUFS1,NCSTN,NDUFB6,UQCRCQ,NDUFS3,PSEN2,ATP5L,BCL2,ACO1,NDUFB11,CASP8,GPD2                                                                                                                                                                                                                                                                                                                                                                                |
| Protein Kinase A Signaling              | AKAP13,MPPE1,GNB1,SMAD4,RAP1A,PTPN13,AKAP1,CDC27,PRKAR2A,PRKCE,PDE12,YWHAQ,CTNNB1,TCF4,ATF1,H3F3A/H3F3B,DUSP2,PTPN23,PTK2,EYA3,GNB2,PLCD3,PRKAR1A,NFKB2,Cal m1,PTPN12,CAMK2G,MAP3K1,RAP1B,PRKAG1,YWHAZ,FLNB,ATF2,AKAP10,CREB1,PTCH1,DUSP11,Hist1h1e,GSK3A,PDE4B,PTPN4,HIST1H1C,HHAT,CREM,HIST1H1D,PDE7A,DUSP1,PTPN11,ROCK1,TCF7L2,PRKCI,ANAPC7,AKAP11,PTPN9,EYA1,CHUK,GNB2L1,MYL12B,VASP,EP300,MYL12A,PTPN3,NFATC1,DUSP22,PTPRJ,MYL6,PDE8A,PTPRK,ITPR3,DUSP5,KDEL2R,PTP4A1,MAP2K2,PRKACA,APEX1,DUSP8,ITPR2,PTEN,TGFB1,SMO,PRKAG2,PRKACB,ROCK2,YWHAQ,GNAI3,ANAPC1,PTPN21,PTPDC1,DUSP4,PTPRS,DUSP16,PRKD3,RAF1,CDC25A,PTPN1,GNB1L,TGFB2,PPP3R1,GN G12,PPP1CB,DUSP6,GSK3B,CDC14B,YWHAQ,CAMK2D,YWHAH,GNAI2,KDEL2R,PPP1R14B,PDE6D,NFAT5,YWHAB,TGFB3,NFKB1,NTN1,PPP1R12A,PTPN2,AKAP8,GLI3,PXN,MYH10,RELA,NFATC3,PPP1R14C,ATF4,GNAS,CDC16,MAPK1 |
| NRF2-mediated Oxidative Stress Response | MAP2K5,ABCC4,DNAJC13,PIK3C2A,DNAJC5,UBE2E3,NQO2,PIK3CB,ENC1,DNAJC21,GSR,DNAJB14,DNAJA4,PRKCE,PIK3R3,GSTT2/GSTT2B,USP14,DNAJB1,PRKD3,RAF1,PMF1/PMF1,BGLAP,SOD1,DNAJC14,MAFF,DNAJC8,NRAS,DNAJC18,PIK3R2,MAP3K1,EPHX1,VCP,JUNB,GSK3B,JUN,MAP2K7,MAPK14,DNAJC17,MAFK,DNAJB12,PIK3R1,DNAJC19,FKBP5,CDC34,MAPK8,PRKCI,GSTP1,CUL3,GCLC,BACH1,DNAJC10,RRAS2,ATM,EP300,TXNRD1,ABCC1,PP1B,ATF4,DNAJA2,MAP2K2,MAPK1,AKR1A1,DNAJB4,UBE2K,KEAP1,GCLM,FOSL1,EIF2AK3,NFE2L2                                                                                                                                                                                                                                                                                                                                                                             |
| Cyclins and Cell Cycle Regulation       | E2F6,GSK3B,PPP2R5E,TGFB1,HDAC10,HDAC8,CDKN2A,CUL1,CCND3,PPP2R5A,SKP2,SKP1,SIN3A,PPP2CB,PA2G4,CDK6,E2F5,CCNE2,HDAC5,TGFB3,CDK4,CDKN2C,RAF1,ATM,PPM1L,CDC25A,CDK2,HDAC3,HDAC7,ABL1,CDKN1B,CCND1,CDKN2B,PPP2R5D,TFDP1,CCNB1                                                                                                                                                                                                                                                                                                                                                                                                                                                                                                                                                                                                                 |
| G2/M DNA Damage Checkpoint Regulation   | KAT2B,YWHAQ,PPM1D,TRIP12,CDKN2A,CUL1,YWHAQ,YWHAH,TOP2B,PKMYT1,SKP2,SKP1,CKS2,YWHAB,MDM4,BRCA1,YWHAQ,PTPMT1,ATM,EP300,ABL1,MDM2,CKS1B,YWHAZ,CCNB1,CHEK1                                                                                                                                                                                                                                                                                                                                                                                                                                                                                                                                                                                                                                                                                   |
| Apoptosis Signaling                     | BIRC2,MAP2K7,MCL1,TNFRSF1A,CYCS,BIRC3,LMNA,ROCK1,MAPK8,CASP2,CAPNS1,CAPN7,PRKCE,NFKB1,MAP4K4,CHUK,RRAS2,RAF1,HTRA2,CAPN1,MAP3K14,IKBK,MAPK10,ACIN1,RELA,NFKB2,NRAS,PARP1,CAPN5,BCL2,BIRC6,MAP2K2,MAPK1,AIFM1,BCL2L1,BID,CASP8,DIABLO                                                                                                                                                                                                                                                                                                                                                                                                                                                                                                                                                                                                     |
| ErbB2-ErbB3 Signaling                   | JUN,GSK3B,SOS2,PTEN,PIK3C2A,GSK3A,PIK3R1,PIK3CB,GRB2,FOXO1,PIK3R3,RRAS2,RAF1,ATM,SP1,TYK2,SOS1,MYC,NRAS,PDPK1,PIK3R2,CDKN1B,CCND1,MAP2K2,MAPK1,STAT5B                                                                                                                                                                                                                                                                                                                                                                                                                                                                                                                                                                                                                                                                                    |
| Oxidative Phosphorylation               | NDUFA10,COX7B,ATP5F1,COX5A,NDUFA1,NDUFV3,ATP5I,NDUFA5,CYCS,NDUFA13,COX7A2,NDUFA8,COX10,COX6B1,UQCRC11,SDHD,ATP5A1,ATPAF1,UQCRCF1,ATP5G2,ATP5C1,NDUFV2,COX4I1,NDUF57,COX7A2L,SDHA,NDUFA2,ATP5D,NDUFS1,NDUFA4,ATP5G1,NDUFA4,UQCRC2,NDUFB6,UQCRCQ,NDUFS3,ATP5L,COX6A1,NDUFB11,UQCRCB,NDUFB2,ATP5G3                                                                                                                                                                                                                                                                                                                                                                                                                                                                                                                                          |
| TGF-β Signaling                         | JUN,SOS2,MAPK14,HOXC9,TGFB1,SMURF2,ACVR2A,SMAD4,RNF111,PIAS4,SMAD7,GRB2,MAPK8,PMPEA1,TRAF6,TGFB3,RRAS2,RAF1,SMAD2,MAPK12,EP300,SOS1,SMAD9,SKI,BMPR2,BMPR1A,TGFB2,NRAS,SMAD5,BCL2,SMAD1,TGIF1,MAP2K2,MAPK1,TFE3                                                                                                                                                                                                                                                                                                                                                                                                                                                                                                                                                                                                                           |
| TCA Cycle II                            | DLD,FH,IDH3B,OGDH,SDHA,DLST,IDH3G,SUCLG1,IDH3A,CS,SDHD,MDH1B,ACO1                                                                                                                                                                                                                                                                                                                                                                                                                                                                                                                                                                                                                                                                                                                                                                        |
| STAT3 Pathway                           | MAPK14,SOCS5,NDUFA13,MAPK8,EGFR,SRC,JAK2,RRAS2,RAF1,MAPK12,PTPN2,CDC25A,MAP3K12,SOCS2,TYK2,MAP3K9,IGF2R,IGF1R,BMPR2,BMPR1A,MYC,TGFB2,NRAS,BCL2,MAP2K2,MAPK1,SOCS1,RAC1                                                                                                                                                                                                                                                                                                                                                                                                                                                                                                                                                                                                                                                                   |
| NF-κB Activation by Viruses             | TRAF2,ITGAV,PIK3C2A,ITGA3,PIK3R1,PIK3CB,ITGB1,PRKCI,PRKCE,NFKB1,CHUK,PIK3R3,RRAS2,PRKD3,RAF1,ATM,MAP3K14,ITGA6,IKBK,IKBKAP,AKT2,RELA,NFKB2,NRAS,PIK3R2,MAP3K1,MAPK1                                                                                                                                                                                                                                                                                                                                                                                                                                                                                                                                                                                                                                                                      |

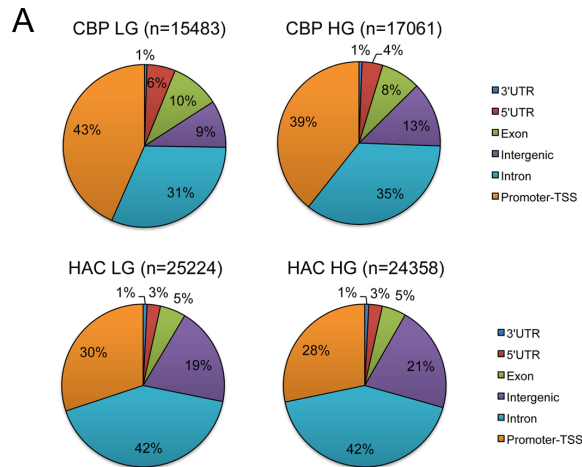

Figure S1. Genomic distribution of CBP and H3K9/14Ac (HAC) peaks. (A) CBP and HAC peaks in genomic features under HG and LG conditions; (B) Genome-wide enrichment of HG-induced CBP and HAC signal peaks.

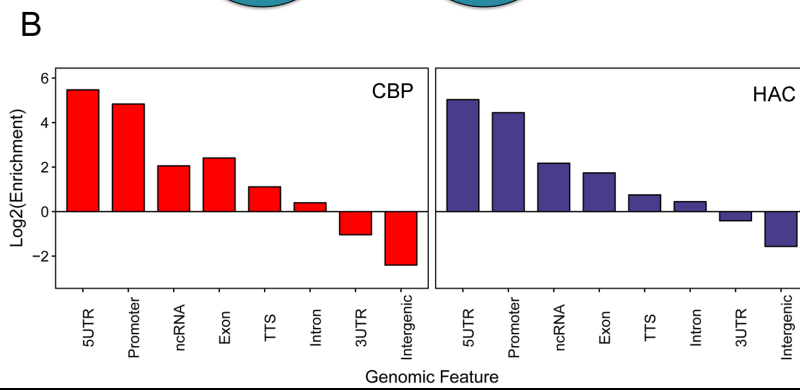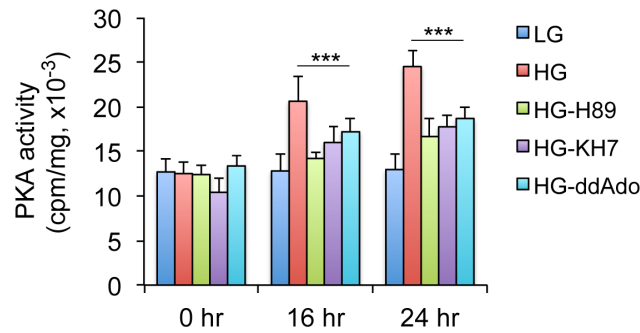

Figure S2. Inhibition of PKA activity by inhibitors specific for adenylyl cyclases or PKA. HG induces PKA activity in MCs at 16 and 24 hours, and the induction is suppressed by PKA inhibitor H89 and adenylyl cyclase inhibitors KH7 and ddAdo. \*\*\* P<0.001; n=3.

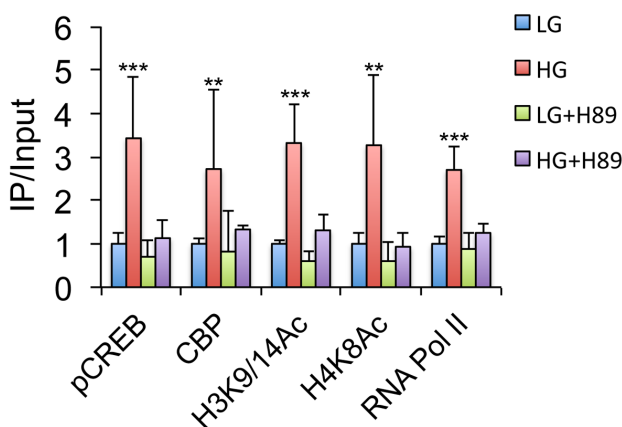

Figure S3. PKA inhibition attenuates high glucose-induced chromatin remodeling in *Tgfb3* promoter. ChIP assays showing that HG-induced pCREB binding, CBP recruitment, H3K9/14 and H4K8 acetylation and RNA Pol II occupation in *Tgfb3* promoter are markedly blocked by H89 treatment. \*\*P<0.01; \*\*\*P<0.001 vs. the rest; n=3.
